# Supplementary material
Source: Springer Nature journal article supplement (https://www.springermedizin.de/resource/supplementary/12885_2010_2305_MOESM5_ESM.pdf/9460980)

# A. PLIER

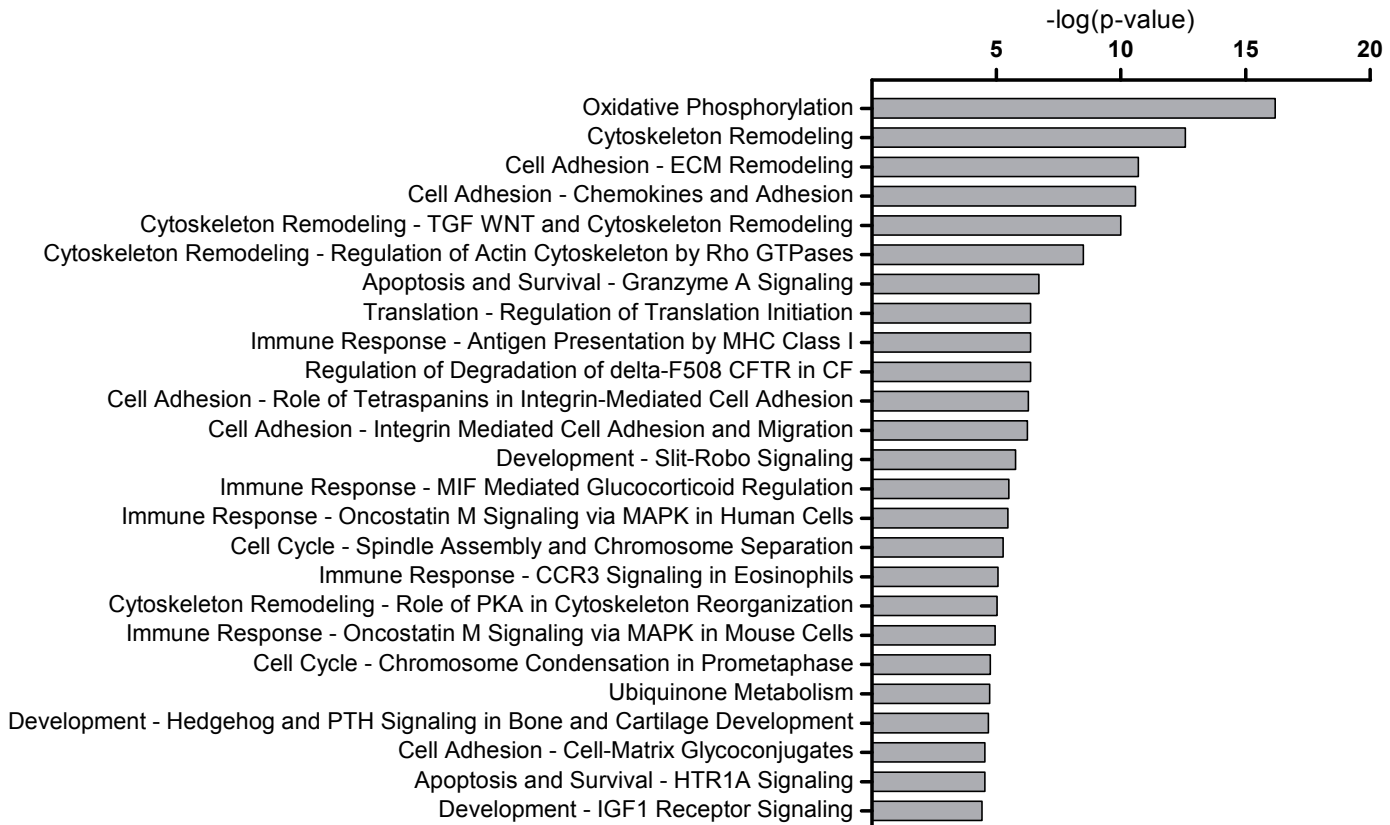

# B. RMA

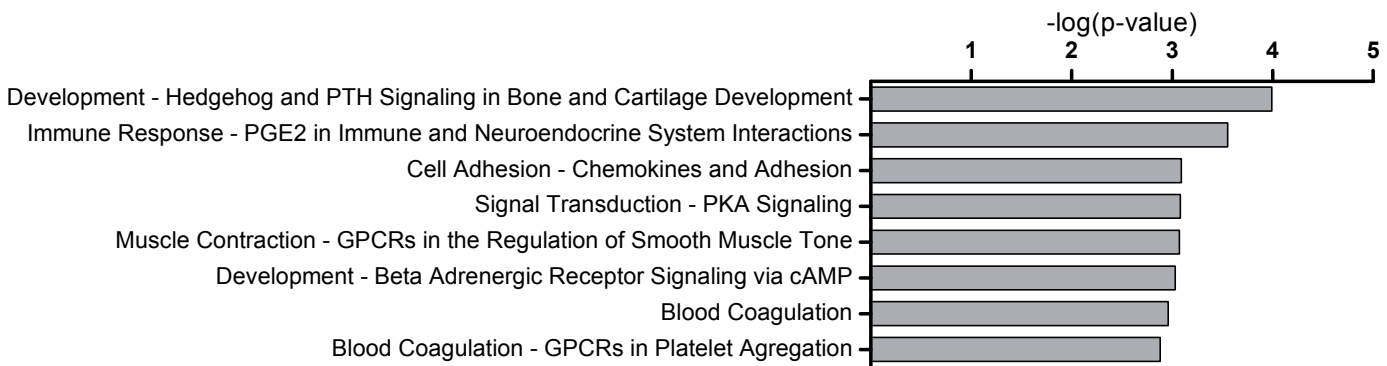

# C. Common

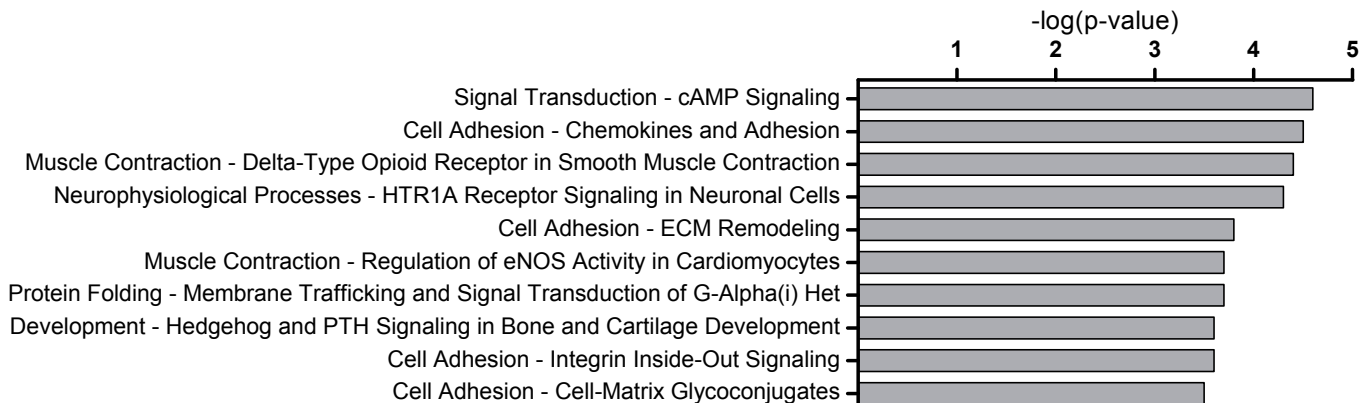

Supplement: MOESM5 [file 9460980]
